# Supplementary material for: Quantitative SARS-CoV-2 Spike Antibody Response in COVID-19 Patients Using Three Fully Automated Immunoassays and a Surrogate Virus Neutralization Test
Source: MDPI journal article supplement (doi:10.3390/diagnostics11081496), 2021-08-19
Supplement: s1 [file s1]

### Supplementary Materials

**Table S1.** Comparisons of SARS-CoV-2 S protein antibody levels by three chemiluminescent immunoassays (Abbott, Roche and Siemens) and the surrogate virus neutralization test (Genscript) in COVID-19 patients according to days after symptom onset and disease severity

|                | Severity           | Days after symptom onset |                      |                          |                            |                             |                            |
|----------------|--------------------|--------------------------|----------------------|--------------------------|----------------------------|-----------------------------|----------------------------|
|                |                    | ≤5                       | 6-8                  | 9-11                     | 12-14                      | 15-21                       | 22≤                        |
| Abbot (AU/mL)  | severe or critical | 5.1†<br>(1.7-231.1)      | 17.6<br>(3.9-2117.0) | 1128.4<br>(256.4-6656.0) | 4670.2*<br>(1184.2-7892.3) | 7621.6*<br>(3900.6-11323.4) | 6615.8*<br>(3855.8-7856.7) |
|                | mild               | 6.5<br>(0.9-87.3)        | 13.1<br>(3.7-128.4)  | 95.5<br>(25.5-722.7)     | 1247.6<br>(181.1-2628.1)   | 955.7<br>(162.7-3573.2)     | 3002.6<br>(309.0-6552.7)   |
| Roche (U/mL)   | severe or critical | 0.4<br>(0.4-4.5)         | 0.4<br>(0.4-49.3)    | 11.7<br>(2.1-130.5)      | 72.9<br>(19.6-160.5)       | 184.0<br>(148.3-386.4)      | 199.5<br>(129.1-378.6)     |
|                | mild               | 0.4<br>(0.4-0.9)         | 0.5<br>(0.4-14.2)    | 4.1<br>(0.5-43.6)        | 62.6<br>(3.0-101.7)        | 64.7<br>(2.8-130.6)         | 89.7<br>(7.9-715.9)        |
| Siemens (U/mL) | severe or critical | 0.1<br>(0.0-1.6)         | 0.2<br>(0.0-12.5)    | 7.2*<br>(1.9-45.2)       | 31.1*<br>(9.4-53.5)        | 72.8*<br>(36.9-95.5)        | 49.5*<br>(34.7-95.7)       |
|                | mild               | 0.1<br>(0.0-0.9)         | 0.2<br>(0.0-0.8)     | 1.1<br>(0.1-4.9)         | 7.4<br>(1.1-22.5)          | 8.5<br>(0.9-22.8)           | 19.1<br>(1.7-61.2)         |
| Genscript (%)  | severe or critical | 11.0<br>(3.0-42.5)       | 28.0<br>(7.4-78.5)   | 71.0<br>(47.8-87.3)      | 90.0<br>(65.3-93.0)        | 92.0<br>(86.9-95.0)         | 88.5<br>(85.0-95.0)        |
|                | mild               | 13.0<br>(8.2-19.8)       | 13.0<br>(2.5-59.4)   | 40.0<br>(17.3-80.1)      | 82.5<br>(31.5-90.1)        | 82.0<br>(36.1-92.2)         | 89.5<br>(47.2-94.8)        |

\*Severe or critical vs. mild ( $p < 0.05$ ). †Median (95% confidence interval)

## Critical

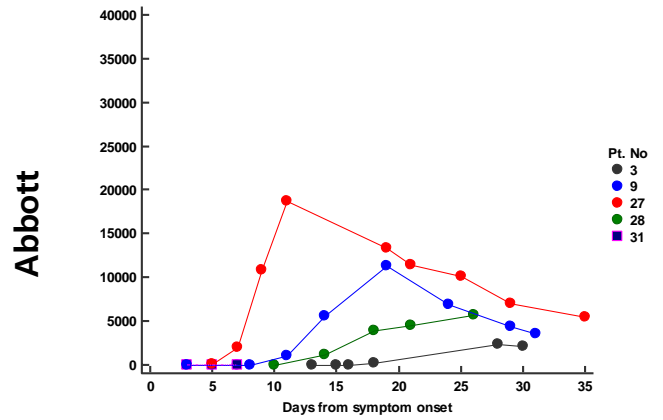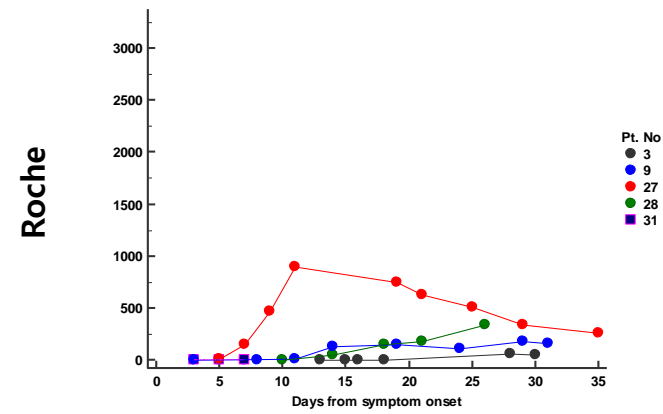

## Severe

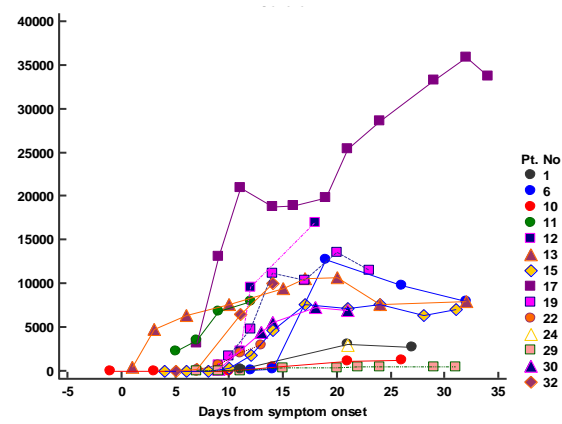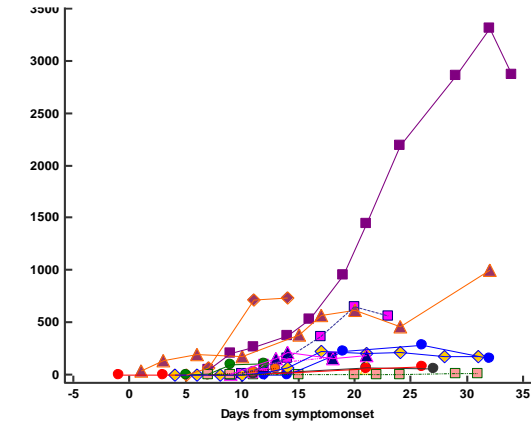

## Mild

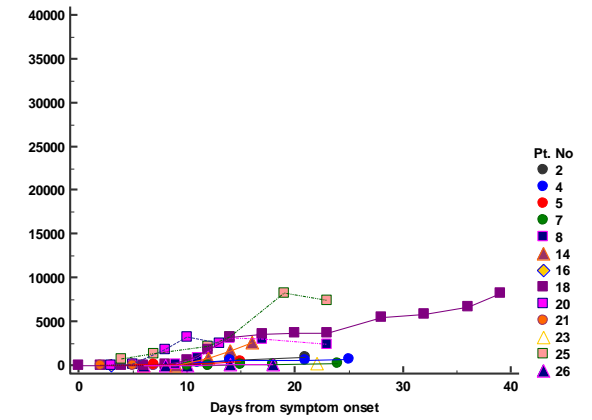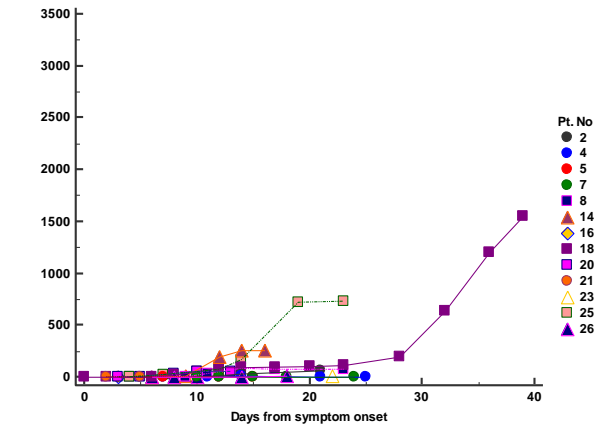

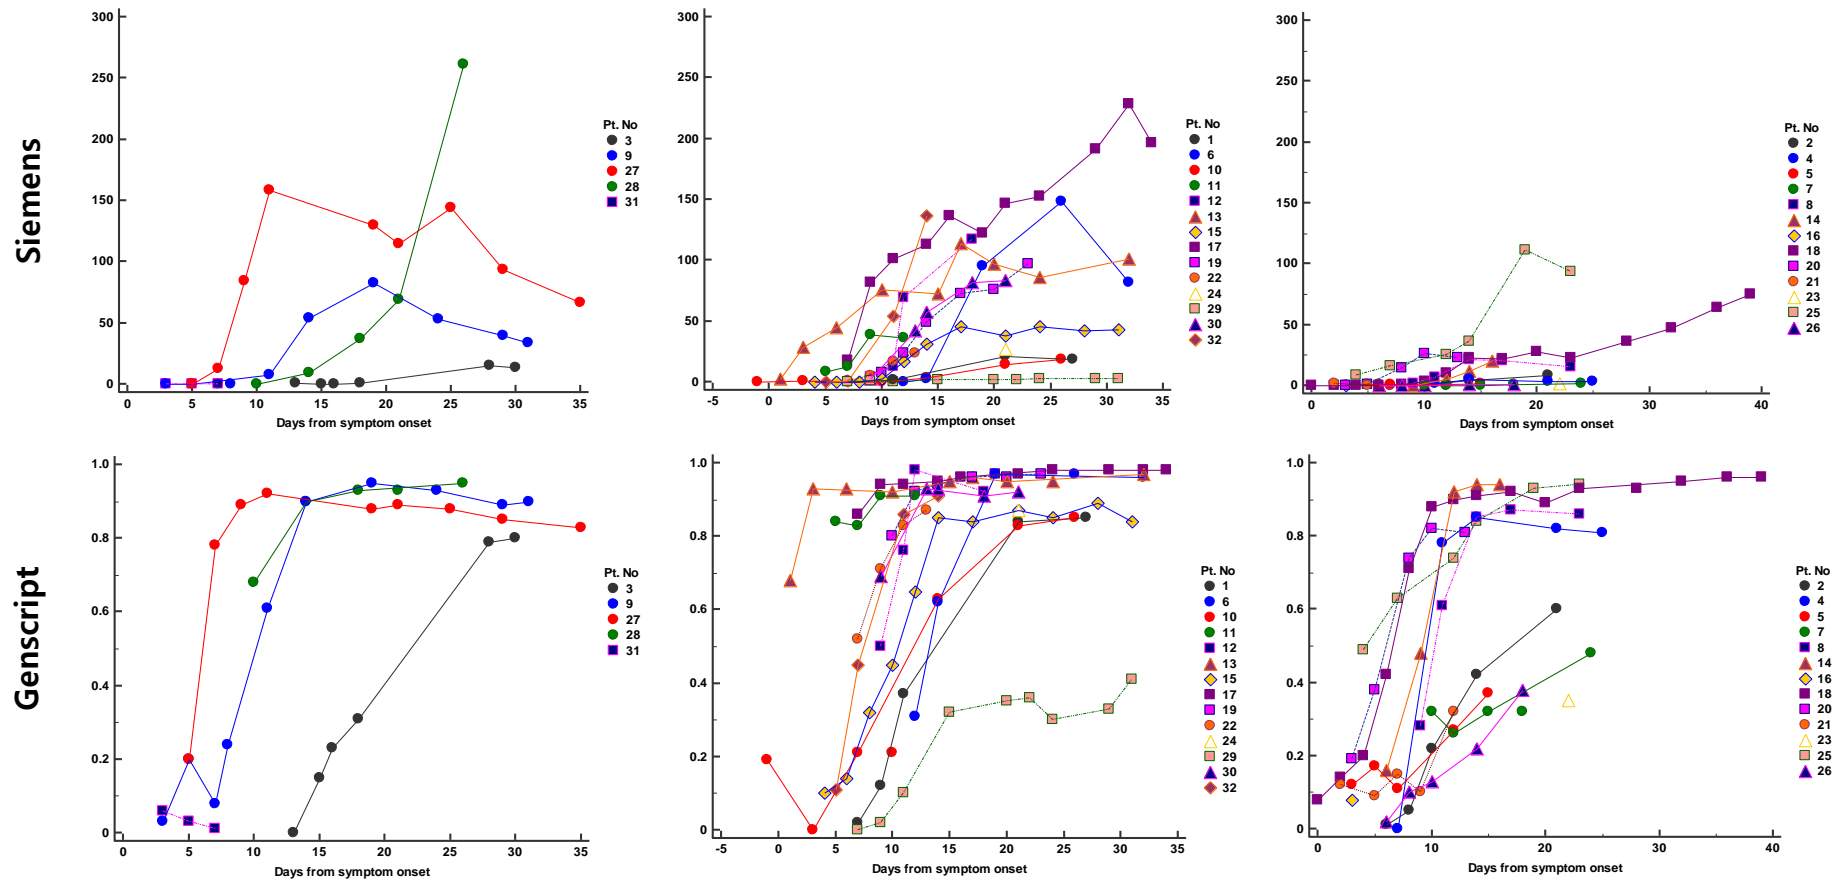

**Figure S1.** SARS-CoV-2 S protein antibody levels measured by three chemiluminescent immunoassays and the surrogate virus neutralization test in 32 COVID-19 patients. Antibody levels are plotted according to days after symptom onset and disease course (critical, severe, or mild) in each assay.

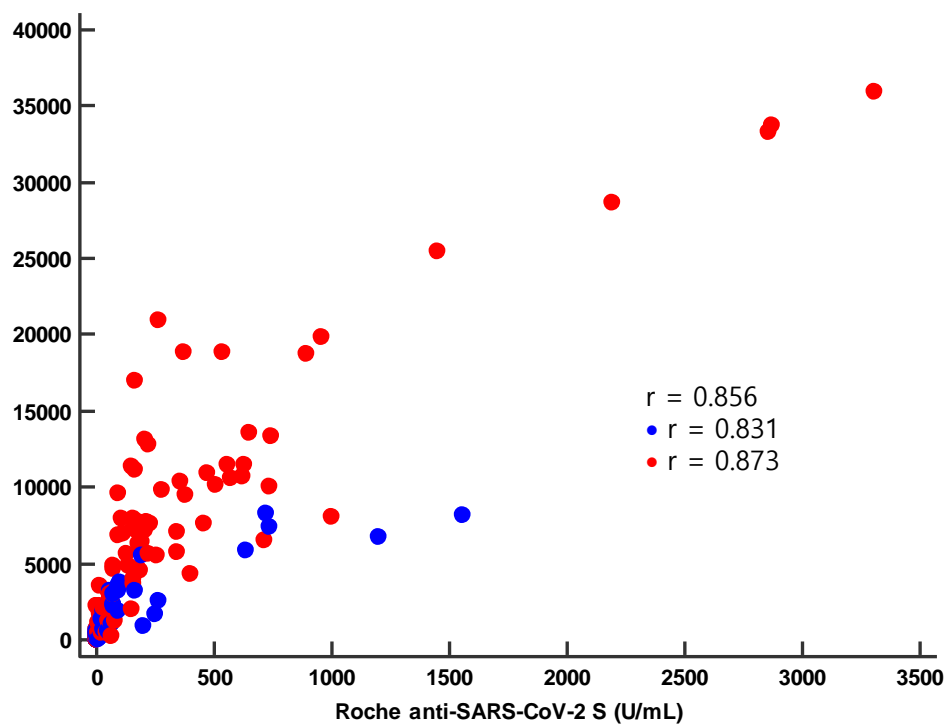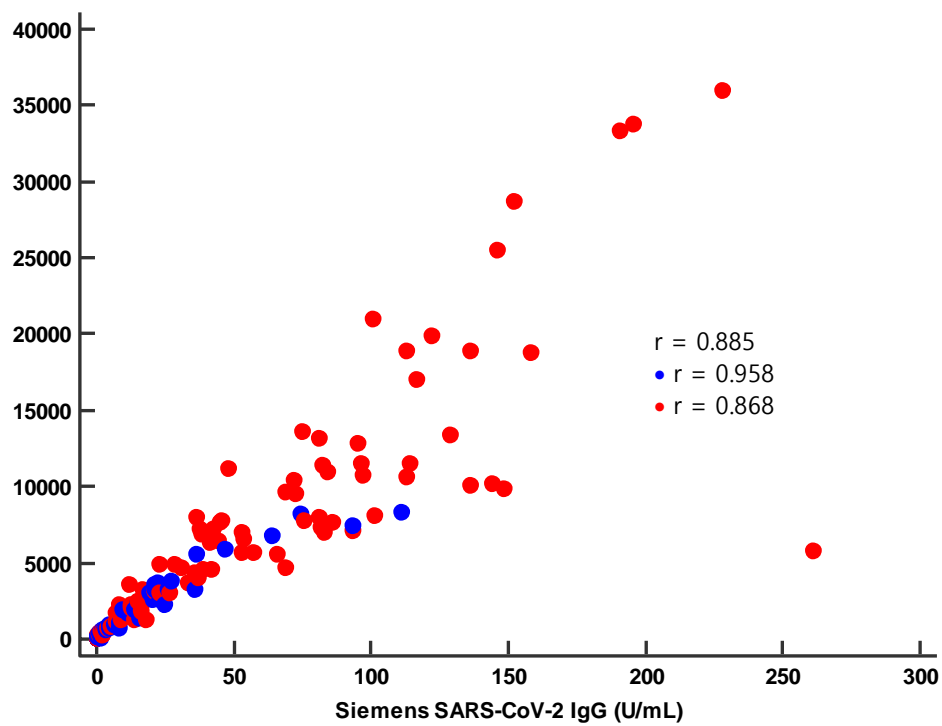

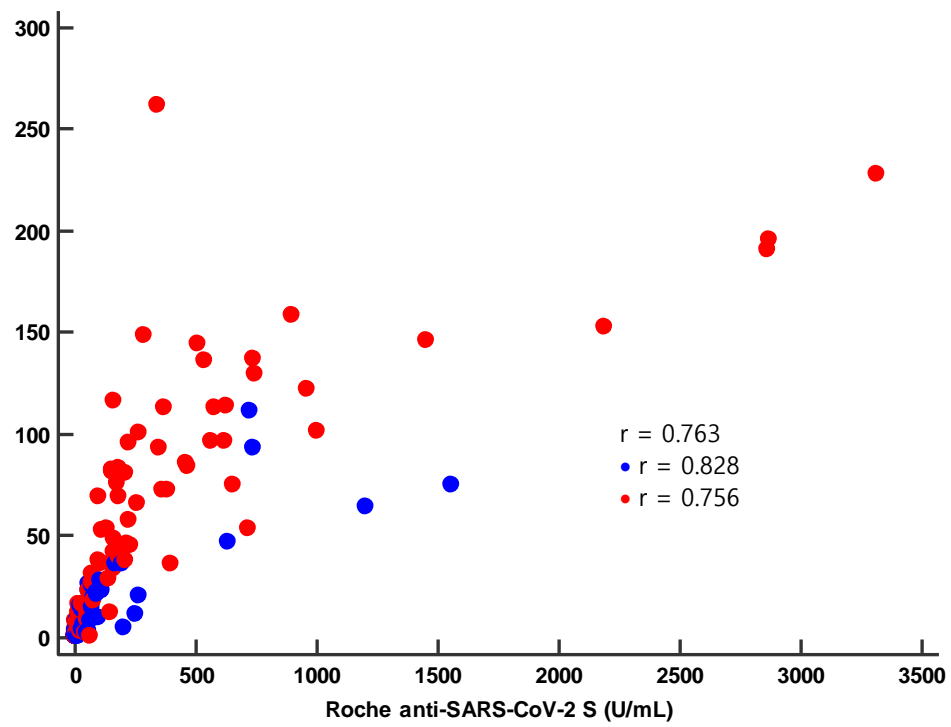

**Figure S2.** Spearman rank correlation between SARS-CoV-2 S protein antibody levels from three chemiluminescent assays.
